1 The Pleistocene species pump past its prime:  
2 evidence from European butterfly sister species

3 Sam Ebdon\*<sup>1</sup>, Dominik R. Laetsch<sup>1</sup>, Leonardo Dapporto<sup>2</sup>,  
4 Alexander Hayward<sup>3</sup>, Michael G. Ritchie<sup>4</sup>, Vlad Dincă<sup>5</sup>, Roger  
5 Vila<sup>6</sup>, and Konrad Lohse<sup>1</sup>

6 <sup>1</sup>Institute of Evolutionary Biology, University of Edinburgh,  
7 Edinburgh, EH9 3FL, UK

8 <sup>2</sup>ZEN lab, Dipartimento di Biologia dell'Università di Firenze,  
9 Firenze, Italy

10 <sup>3</sup>Centre for Ecology and Conservation, University of Exeter,  
11 Penryn Campus, Cornwall, TR10 9FE, UK

12 <sup>4</sup>Centre for Biological Diversity, School of Biology, University of St  
13 Andrews, Fife KY16 9TH, UK

14 <sup>5</sup>Ecology and Genetics Research Unit, University of Oulu, Oulu,  
15 Finland

16 <sup>6</sup>Institut de Biologia Evolutiva (CSIC - Universitat Pompeu  
17 Fabra), Passeig Marítim de la Barceloneta 37, ESP-08003  
18 Barcelona, Spain

19 \* correspondence to sam.ebdon@ed.ac.uk

20

## 21 **Abstract**

22 The Pleistocene glacial cycles had a profound impact on the ranges and genetic  
23 make-up of organisms. Whilst it is clear that the current contact zones between  
24 sister taxa are secondary and have formed during the last interglacial, it is un-  
25 clear when the taxa involved began to diverge. Previous estimates are unreliable  
26 given the stochasticity of genetic drift and the contrasting effects of incomplete  
27 lineage sorting and gene flow on gene divergence. We use genome-wide tran-  
28 scriptome data to estimate divergence for 18 sister species pairs of European  
29 butterflies showing either sympatric or contact zone distributions. We find that  
30 in most cases species divergence was initiated before the Pleistocene, substan-  
31 tially earlier than assumed previously, and that post divergence gene flow is  
32 restricted to contact zone pairs, although they are not systematically younger  
33 than sympatric pairs. This suggests that contact zones are not limited to early  
34 stages in the speciation process, but can involve notably old taxa.

## 35 **Introduction**

36 Divergence in allopatry provides a simple null model of speciation [1]. Fol-  
37 lowing geographic isolation and given enough time, reproductive isolation is  
38 inevitable as incompatibilities will eventually become fixed as a result of genetic  
39 drift and/or selection [2–4]. Taxa that evolved partial reproductive isolation  
40 in allopatry may come into secondary contact as a result of range shifts and –  
41 depending on their degree of reproductive isolation and niche overlap – either  
42 form a contact zone or invade each other’s range [5, 6]. If allopatric divergence

43 dominates speciation, then local alpha diversity for a given clade cannot accrue  
44 until secondary sympatry is achieved [7]. Thus the forces that facilitate or ham-  
45 per secondary sympatry and the timescale over which this occurs have profound  
46 consequences both for speciation and the spatial distribution of species diversity.  
47 While modern ranges only provide a snapshot of the dynamic history of range  
48 shifts, understanding the extent to which current range overlap between closely  
49 related species can be explained by their speciation history and *vice versa* has  
50 been at the core of speciation research [8].

51 The glacial cycles of the Pleistocene had a profound effect on current diver-  
52 sity of temperate ecosystems [9–11]. Populations of temperate taxa in Europe  
53 were isolated in ice-free refugia around the Mediterranean basin (Iberia, Italy,  
54 the Balkans and the larger Mediterranean islands) as glaciers encroached. The  
55 observation that the geographic ranges of many young taxa are restricted to in-  
56 dividual glacial refugia in southern Europe [9, 12–14] suggests that this repeated  
57 separation into and expansion out of glacial refugia has played a major role in  
58 their origin. The availability of allozyme and mitochondrial (*mt*) data in the  
59 80s and 90s has spurred an abundance of case studies on intra- and interspecific  
60 diversity of European taxa including detailed investigations of hybrid zones in  
61 taxa ranging from fire-bellied toads [15], the house mouse [16], grasshoppers  
62 [17, 18] to plants [19] and marine mussels [20]. The pervading evidence from  
63 these studies is that genetic diversity within and in, many cases, divergence  
64 between species is structured by refugia [9, 21, 22].

### 65 **When was divergence between sister species initiated?**

66 While it is clear that the hybrid zones we observe today are secondary contacts  
67 that formed after the last glacial maximum and may have formed many times  
68 over throughout the Pleistocene, it is far from clear when divergence between

69 the sister taxa involved was initiated. One possibility is that the Pleistocene  
70 glacial cycles initiated species divergence directly by separating populations into  
71 allopatric refugia (i.e. a 'species pump' [23]). Another possibility is that the  
72 initial divergence between sister species predates the Pleistocene, and so, any  
73 build-up of reproductive isolation during the Pleistocene (e.g. via the fixation of  
74 intrinsic incompatibilities and/or reinforcement) occurred in populations that  
75 were already partially diverged. If the Pleistocene species pump hypothesis  
76 is correct, we would expect species divergence times across sister pairs to be  
77 concentrated during or at the beginning of the Pleistocene about 2.6 million  
78 years ago (MYA). The idea that Pleistocene divergence acted as a species pump  
79 was first proposed in the context of American faunas [23–25], but has also  
80 dominated phylogeographic studies on European sister taxa [e.g. 9, 26–29].  
81 Other studies including some of the early work on European contact zones [5, 17]  
82 conclude that initial divergence of the taxa involved may substantially predate  
83 the Pleistocene [9, 30–32]. An important question to resolve, then, is whether  
84 divergence of such sister taxa is the result of a 'Pleistocene species pump' or has  
85 an older, deeper origin?

86 A corollary for the hypothesis of allopatric speciation in different refugia  
87 is that range overlap is secondary. Since species can more easily invade each  
88 others ranges once sufficient premating barriers and ecological differentiation  
89 have developed, we would expect species pairs with overlapping ranges to be  
90 older overall than those without range overlap, all else being equal [8]. Support  
91 for this prediction comes from comparative studies showing that the proportion  
92 of range overlap (degree of sympatry [33]) is positively (albeit weakly) corre-  
93 lated with genetic divergence [6, 34]. However, a recent study in *Chorthippus*  
94 grasshoppers shows that subspecies that hybridise across contact zones can be  
95 older than currently sympatric species [35].

## 96 **Mito-nuclear discordance**

97 Age estimates for recently diverged taxa have largely relied on single locus phy-  
98 logenies and ignored incomplete lineage sorting. Hewitt [14] summarises age  
99 estimates for European hybrid zones taxa including mammals, insects, amphib-  
100 ians, and reptiles, which range from hundreds of thousands to several million  
101 years ago. However, given that these estimates are based on different mark-  
102 ers and calibrations, the extent to which glacial cycles have initiated speciation  
103 events remains unknown. Estimates based on mitochondrial (*mt*) data are par-  
104 ticularly unreliable for at least three reasons. First, the mutation rate of mtDNA  
105 is highly erratic [36]. Second, given the stochasticity of coalescence, the ances-  
106 try of a single locus (however well resolved) is a very poor measure of species  
107 divergence. In the absence of gene-flow divergence at a single locus may sub-  
108 stantially predate the onset of species divergence, while it may be much more  
109 recent in the presence of gene flow [37, 38]. Mito-nuclear discordance in both  
110 directions has been found in a large number of animal systems [39] including  
111 several closely related species of European butterflies [40–42]. Finally, mtDNA  
112 does not evolve neutrally since transmission of mitochondria is completely linked  
113 to maternal inheritance of endosymbionts such as *Wolbachia* and *Spiroplasma*  
114 and, in organisms with Z/W sex determination, of the W chromosome. Thus *mt*  
115 diversity and divergence may be driven largely by selective sweeps (including  
116 introgression sweeps) rather than neutral gene flow and genetic drift [36, 43–45].

## 117 **European butterflies as a model group**

118 Lepidoptera are arguably the best-studied arthropod family: European butter-  
119 flies provide a unique opportunity to investigate divergence and speciation pro-  
120 cesses comparatively [22]. Near-complete information on geographic ranges and  
121 key life-history traits (e.g. voltinism and host plant range) is available [46, 47].

122 Additionally, the taxonomy of all 496 European species [48] is well resolved and a  
123 complete, multilocus phylogeny of all European taxa exists [22]. This combined  
124 with extensive DNA barcode reference libraries [22, 49], facilitates the identifi-  
125 cation of species (especially in the case of cryptic taxa) and provides extensive  
126 sampling of sister species pairs, many of which abut at narrow contact zones  
127 [12, 50, 51] (Figure 1). Secondary contact zones have been described in detail  
128 for several European taxa, including the *Spialia orbifer* and *S. sertorius* [52],  
129 the Italian *Pontia* hybrid zone [53] and the contact zones between *Iphiclides*  
130 *podalirus* and *I. feisthamelii* and between *Melanargia galathea* and *M. lachesis*  
131 along the Pyrenees [54–56].

132 Testing whether climate-induced Pleistocene range shifts have triggered spe-  
133 ciation or patterned older splits between species requires replication both at the  
134 level of genetic loci and at the level of speciation events. Although we can now  
135 generate WGS data for any species, there are surprisingly few reliable estimates  
136 for the onset of divergence between European sister species and such estimates  
137 are lacking even for well studied (non-Lepidopteran) contact zone taxa [but see  
138 35, 57].

139 Here we use European butterflies as a model system to investigate to what  
140 extent the divergence times between sister species in this group are concentrated  
141 in the Pleistocene, as predicted by the Pleistocene species pump hypothesis, and  
142 test how well recent sister species fit a null model of divergence in allopatry. Al-  
143 though European butterflies have been studied intensively, the robust estimates  
144 of divergence required for any systematic comparison of speciation are lacking  
145 [but see 58]. Wiemers *et al.* [59] generated a time-calibrated multilocus phy-  
146 logeny for all European butterfly species. However, these phylogenetic node  
147 ages do not account for ancestral lineage sorting and are largely informed by  
148 mitochondrial data and small numbers of nuclear loci (Fig S5). We generate

149 RNAseq data for 18 sister species pairs and ask the following specific questions:

150 i) Has speciation been initiated during the Pleistocene as envisaged by the  
151 species-pump hypothesis or did the glacial cycles pattern pre-existing, older  
152 subdivisions?

153 ii) Are sister species pairs that form contact zones younger than pairs that  
154 overlap in range?

155 iii) Is there evidence for gene flow in contact zone species?

156 iv) How strongly correlated are mitochondrial and nuclear divergence and  
157 do contact zone pairs show increased mito-nuclear discordance?

## 158 **Results**

159 We identified true sister species pairs in the European butterfly phylogeny [22].

160 Species pairs involving island and mountain endemics, were excluded, as these  
161 cannot achieve secondary sympatry. We also did not consider species pairs

162 that are unlikely to have originated in Europe, e.g. sister pairs involving North

163 American taxa. Following these criteria, we sampled 18 sister species pairs.

164 Our sampling includes 7.3 % of European butterfly species and almost all 'good'

165 butterfly sister species pairs in Europe [60]. We quantified relative range overlap

166 (degree of sympatry) for each pair using occurrence data (see Methods) and,

167 based on this, classified nine pairs as contact zone taxa.

168 For each species, where possible, we generated RNASeq data for two samples,

169 one male and one female from different localities.

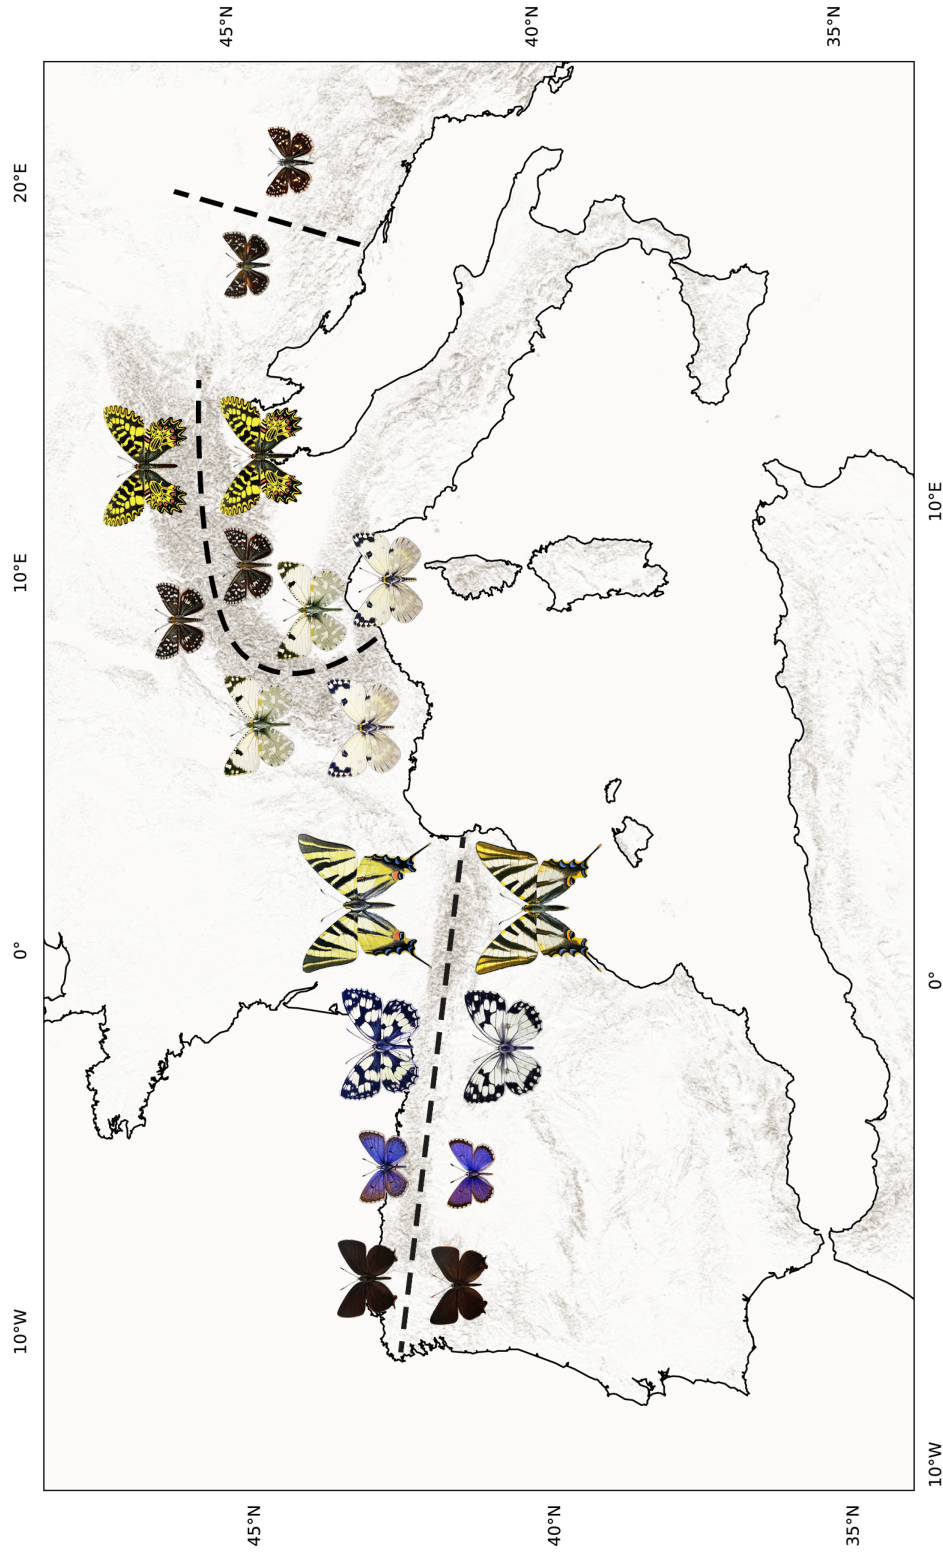

Figure 1: Nine of the 18 sister species pairs of butterfly in which we quantified genome-wide divergence meet at contact zones in southern Europe. In the left group, from left to right across northern Iberia are *Satyrion*, *Pseudophilotes*, *Melanargia*, and *Iphichlides*. In the center group, from bottom to top across the Alps are *Pontia*, *Euchloe*, *Pyrgus*, and *Zerynthia*. Finally, on the right across the Balkans is the genus *Spialia*.



| Species                        | Sister 1 |              | Sister 2 |              | $\pi$  | Gen $y^{-1}$ | Species                 | $\pi$  | Gen $y^{-1}$ | $d_{xy}$ | $d_s$  | Split time (MYA) | $F_{st}$ | Degree of Sympatry | Contact Zone | Known to hybridise |
|--------------------------------|----------|--------------|----------|--------------|--------|--------------|-------------------------|--------|--------------|----------|--------|------------------|----------|--------------------|--------------|--------------------|
|                                | $\pi$    | Gen $y^{-1}$ | $\pi$    | Gen $y^{-1}$ |        |              |                         |        |              |          |        |                  |          |                    |              |                    |
| <i>Brenthis daphne</i>         | 0.0046   | 1            | 0.0094   | 1            | 0.0246 | 0.0176       | <i>B. ino</i>           | 0.0094 | 1            | 0.0246   | 0.0176 | 3.04             | 0.716    | 0.74               | No           | No                 |
| <i>Colias affacariensis</i>    | 0.0243   | 2-3          | 0.0211   | 2-3          | 0.0387 | 0.0160       | <i>C. hyale</i>         | 0.0211 | 2-3          | 0.0387   | 0.0160 | 0.92             | 0.413    | 0.70               | No           | No                 |
| <i>Euchloe ausonia</i>         | 0.0250   | 2            | 0.0352   | 2            | 0.0715 | 0.0415       | <i>E. crameri</i>       | 0.0352 | 2            | 0.0715   | 0.0415 | 3.58             | 0.580    | 0.00               | Yes          | No                 |
| <i>Gonepteryx cleopatra</i>    | 0.0104   | 1            | 0.0156   | 1            | 0.0448 | 0.0318       | <i>G. rhamni</i>        | 0.0156 | 1            | 0.0448   | 0.0318 | 5.48             | 0.710    | 0.97               | No           | Yes                |
| <i>Iphiclides feisthamelii</i> | 0.0079   | 1-3          | 0.0052   | 1-3          | 0.0275 | 0.0209       | <i>I. podalirius</i>    | 0.0052 | 1-3          | 0.0275   | 0.0209 | 1.20             | 0.761    | 0.00               | Yes          | Yes                |
| <i>Lasiommata megera</i>       | 0.0385   | 2-3          | 0.0065   | 1            | 0.0543 | 0.0319       | <i>L. petropolitana</i> | 0.0065 | 1            | 0.0543   | 0.0319 | 2.75             | 0.587    | 0.43               | No           | No                 |
| <i>Leptidea reali</i>          | 0.0077   | 1-2          | 0.0093   | 1-3          | 0.0153 | 0.0068       | <i>L. sinapis</i>       | 0.0093 | 1-3          | 0.0153   | 0.0068 | 0.47             | 0.444    | 1.00               | No           | No                 |
| <i>Melanargia galathea</i>     | 0.0152   | 1            | 0.0145   | 1            | 0.0389 | 0.0240       | <i>M. lachesis</i>      | 0.0145 | 1            | 0.0389   | 0.0240 | 4.14             | 0.618    | 0.20               | Yes          | Yes                |
| <i>Pieris mannii</i>           | 0.0100   | 3            | 0.0198   | 3-4          | 0.0678 | 0.0529       | <i>P. rapae</i>         | 0.0198 | 3-4          | 0.0678   | 0.0529 | 2.60             | 0.780    | 1.00               | No           | No                 |
| <i>Polyommatus eros</i>        | 0.0104   | 1            | 0.0174   | 1-3          | 0.0529 | 0.0391       | <i>P. icarus</i>        | 0.0174 | 1-3          | 0.0529   | 0.0391 | 3.37             | 0.738    | 1.00               | No           | Yes                |
| <i>Pontia daplidice</i>        | 0.0063   | 3            | 0.0159   | 3            | 0.0516 | 0.0405       | <i>P. edusa</i>         | 0.0159 | 3            | 0.0516   | 0.0405 | 2.33             | 0.785    | 0.00               | Yes          | Yes                |
| <i>Pseudophilotes baton</i>    | 0.0080   | 1-2          | 0.0131   | 1            | 0.0276 | 0.0171       | <i>P. panoptes</i>      | 0.0131 | 1            | 0.0276   | 0.0171 | 1.97             | 0.620    | 0.00               | Yes          | No                 |
| <i>Pyrgus malvae</i>           | 0.0164   | 1-2          | 0.0176   | 1-2          | 0.0362 | 0.0192       | <i>P. malvoides</i>     | 0.0176 | 1-2          | 0.0362   | 0.0192 | 1.66             | 0.531    | 0.04               | Yes          | Yes                |
| <i>Satyrium esculi</i>         | 0.0076   | 1            | 0.0036   | 1            | 0.0432 | 0.0377       | <i>S. ilicis</i>        | 0.0036 | 1            | 0.0432   | 0.0377 | 6.49             | 0.870    | 0.06               | Yes          | No                 |
| <i>Satyrus actaea</i>          | 0.0261   | 1            | 0.0074   | 1            | 0.0663 | 0.0495       | <i>S. ferula</i>        | 0.0074 | 1            | 0.0663   | 0.0495 | 8.53             | 0.747    | 0.26               | No           | No                 |
| <i>Spialia orbifer</i>         | 0.0331   | 2            | 0.0418   | 2            | 0.0671 | 0.0296       | <i>S. sertorius</i>     | 0.0418 | 2            | 0.0671   | 0.0296 | 2.55             | 0.441    | 0.12               | Yes          | No                 |
| <i>Thymelicus acteon</i>       | 0.0154   | 2            | 0.0208   | 1            | 0.0848 | 0.0666       | <i>T. sylvestris</i>    | 0.0208 | 1            | 0.0848   | 0.0666 | 7.66             | 0.786    | 0.99               | No           | No                 |
| <i>Zerynthia cassandra</i>     | 0.0033   | 1            | 0.0032   | 1            | 0.0312 | 0.0279       | <i>Z. polyxena</i>      | 0.0032 | 1            | 0.0312   | 0.0279 | 4.82             | 0.895    | 0.00               | Yes          | No                 |

Table 1: Estimates of mean gene divergence ( $d_{xy}$ ), net gene divergence ( $d_s$ ) and differentiation ( $F_{st}$ ) at 4D sites and lower bounds for species divergence times for 18 sister species pairs of European butterfly. Gen  $y^{-1}$  is the number of generations per year.

170 **Most European butterfly sister species predate the Pleis-**  
171 **tocene**

172 We assumed a simple null model of divergence without gene flow, neutrality  
173 and an infinite sites mutation model and used net mean divergence at fourfold  
174 degenerate (4D) sites  $d_a = d_{xy} - \pi$  [61] to estimate species divergence time  
175  $T = \frac{d_a}{2\mu}$ . Here  $\mu$  is the *de novo* mutation rate per generation (per base). We  
176 assumed  $\mu = 2.9 * 10^{-9}$ , an estimate of the spontaneous mutation rate obtained  
177 from parent-offspring trios of South American *Heliconius melpomene* butterflies  
178 [62]. Since both violations of the mutation model (back-mutations) and the  
179 demographic model (gene flow) reduce  $d_a$ , this time estimate is a lower bound  
180 of the true species divergence time. We converted estimates of species divergence  
181 time ( $T$ ) into years ( $\tau$ ) using the mean generation time of each pair (Table 1).

182 Species divergence times obtained from  $d_a$  at fourfold degenerate sites (4D)  
183 ranged from 0.47 (*Leptidea*) to 8.5 (*Satyrus*) MYA, with a mean of 3.8 MYA,  
184 (Figure 2). Even though these estimates are lower bounds of species divergence  
185 (see Discussion), they not only substantially predate the last glacial cycles but,  
186 in the majority (11 out of 18) pairs, are older than the entire Quaternary period  
187  $\approx 2.6$  MY (Table 1). Three of the seven pairs with a recent, Pleistocene diver-  
188 gence time estimates fall in the early Pleistocene: *Pseudophilotes* (1.97 MYA),  
189 *Pontia* (2.33 MYA) and *Spialia* (2.55 MYA).

190 **Sister pairs that form contact zones are not significantly**  
191 **younger than sympatric pairs**

192 Mean gene divergence ( $d_{xy}$ ) at 4D sites between sister species ranged from 1.5%  
193 to 8.5%, with a mean of 4.7% (Table 1, Figure 2) across the 18 pairs. There are  
194 two reasons to expect species pairs that form contact zones to be younger than  
195 sympatric pairs: First, if speciation under a null model of divergence in allopatry

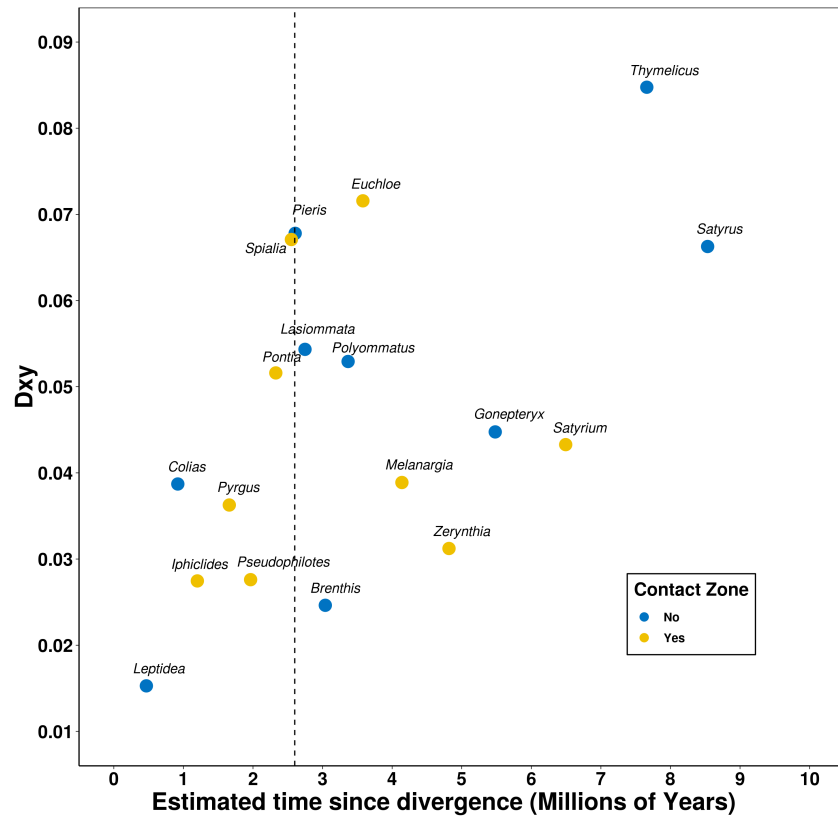

Figure 2: Species divergence time estimates plotted against mean genetic divergence ( $d_{xy}$ ) for 18 European butterfly sister species pairs. Pairs which abut at contact zones (degree of sympatry  $\leq 0.2$ ) are shown in yellow, sympatric pairs with substantial range overlap ( $> 0.2$ ) in blue. The vertical dashed line represents the beginning of the Pleistocene (2.6 MYA).

196 is initiated by periods of vicariance, the formation of a contact zone (parapatry)  
197 represents an earlier stage in the transition to complete reproductive isolation  
198 and substantial range overlap (sympatry) [8]. Second, any gene flow across  
199 contact zones would reduce  $d_a$  and hence our estimate of species divergence.  
200 The nine pairs that form contact zones (degree of sympatry  $\leq 0.2$ ) have a lower  
201 net divergence ( $d_a = 0.0287$ , SD = 0.00930) than the nine sympatric pairs  
202 (degree of sympatry  $> 0.2$ ,  $d_a = 0.0347$ , SD = 0.0195 Table 1), however, this  
203 difference is not significant ( $t = -0.82999$ , df = 11.478,  $p = 0.210$ ). Additionally,  
204 we find no relationship between the degree of sympatry and  $d_a$  ( $t = 0.723$ , df =  
205 16,  $p = 0.480$ ). Similarly, we may expect pairs that are still able to form hybrids  
206 (i.e. for which F1s have been observed in the wild) to be younger than those  
207 that do not. However, contrary to this expectation, we again find no significant  
208 difference in net divergence between pairs which do and do not hybridise ( $d_a$   
209 0.0293 and 0.0329 respectively,  $t = -0.582$ , df = 15.861,  $p = 0.284$ ).

## 210 **Evidence for recent gene flow in some contact zone pairs**

211 Rather than fit explicit models of demographic history which is difficult using  
212 transcriptome data for minimal samples of individuals, we tested for signals of  
213 post divergence gene flow in the distribution of pairwise differences in sequence  
214 blocks of a fixed length. This distribution may differ from analytic expectations  
215 under a model of neutral divergence (and assuming no recombination within  
216 blocks [63, 64]) in two ways: while gene flow widens the distribution of pairwise  
217 differences, recombination within blocks narrows it [65]. Thus, in the absence  
218 of gene flow, we would expect empirical distributions to be narrower than the  
219 analytic expectation while wider distributions are indicative of post-divergence  
220 gene flow.

221 The empirical distribution of pairwise differences deviated significantly (see

222 Methods for details) from the expectation in a majority of species pairs (12  
223 out of 18) (Figure 3 S6). Of these, eight pairs have narrower distributions  
224 than expected, compatible with recombination within blocks and four pairs  
225 have wider distributions than expected, compatible with post-divergence gene  
226 flow (*Pseudophilotes*, *Pontia*, *Iphiclides*, *Zerynthia*). While the eight pairs with  
227 narrower distributions are equally split between contact and sympatric pairs, all  
228 four taxa with wider distributions are contact zone pairs (Figure 3). However,  
229 given the limited number of pairs overall, this difference between contact zones  
230 and sympatric pairs is not significant (Fisher's exact test,  $p = 0.0901$ ).

### 231 **Pervasive mito-nuclear discordance in contact zone species** 232 **pairs**

233 Our estimates of species divergence are based on average net divergence ( $d_a$ )  
234 across many hundreds of genes and are robust to how orthologues are filtered  
235 (Figure S1). Given that previous studies on European butterflies have been  
236 largely based on mitochondrial (*mt*) phylogenies, an important question is to  
237 what extent *mt* divergence is correlated with mean nuclear divergence. We find  
238 that both  $d_a$  and  $d_{xy}$  at COI are positively but only weakly correlated with mean  
239 nuclear divergence (Figure 4). The correlation is weaker for  $d_a$  than  $d_{xy}$  ( $R^2$   
240 = 0.27 and 0.31 respectively) which is compatible with mitochondrial diversity  
241 (and hence  $d_a$ ) being disproportionately affected by selective sweeps. Similarly,  
242 comparing the relation between *mt* and nuclear  $d_a$  between contact zone and  
243 sympatric pairs, we find a much shallower slope for contact zone pairs (0.29  
244 compared to 0.99, Figure 4)). This difference is largely a result of reduced *mt*  
245 diversity in contact zone compared to sympatric pairs (mean  $\pi = 0.0030$ , SD =  
246 0.0014 and  $\pi = 0.0047$ , SD = 0.0031 respectively  $t = 1.5763$ ,  $df = 11.324$ ,  $p =$   
247 0.0712). This suggests that *mt* diversity is more strongly affected by selective

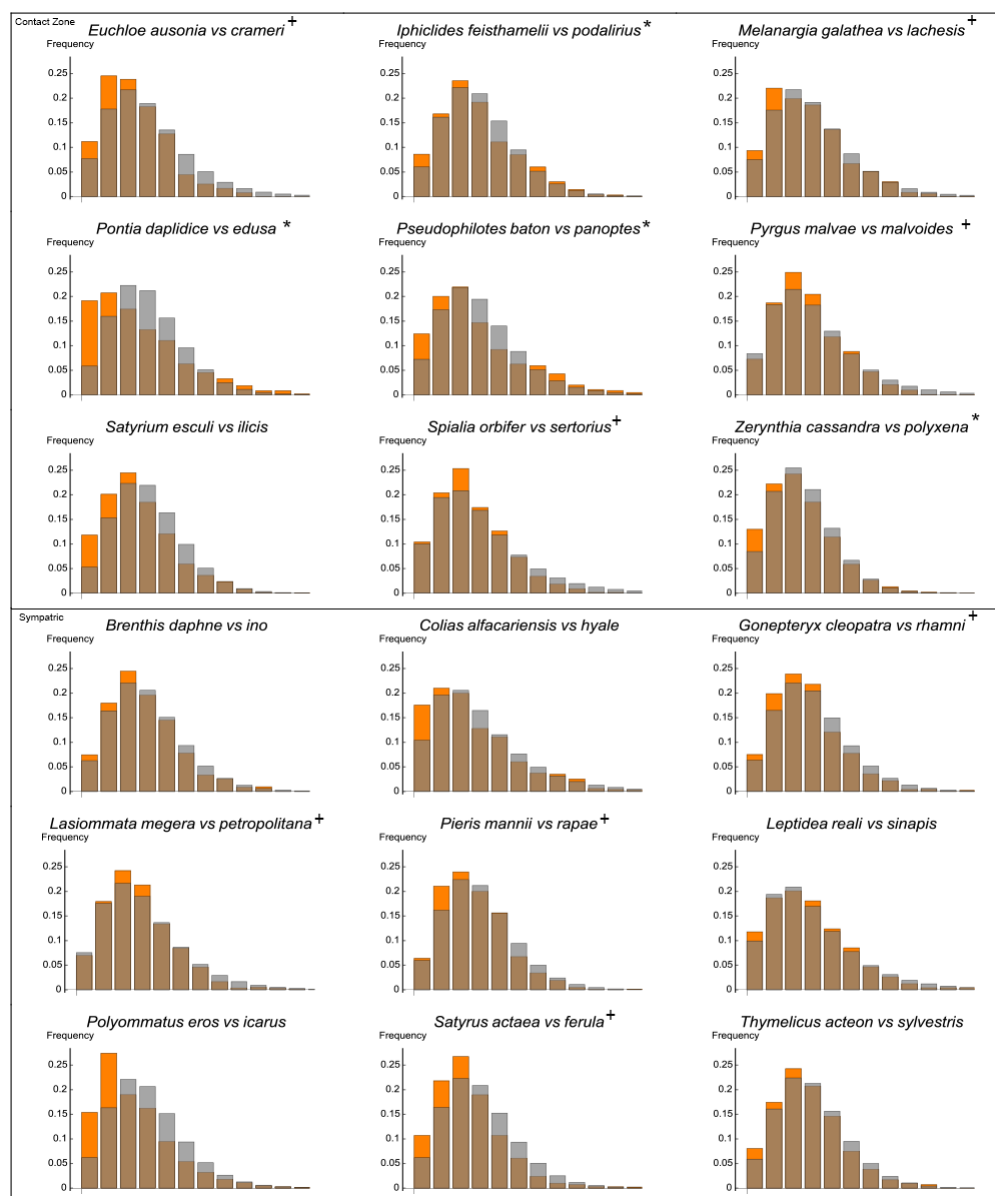

Figure 3: The distribution of pairwise differences (in blocks of a fixed length of 4D sites) in contact (upper box) and sympatric (lower box) pairs. The observed distribution in single copy orthologues is shown in orange, the expectation under a history of strict divergence (estimated from  $\pi$  and  $d_a$ ) in grey. Pairs that show wider than expected distributions are marked with an asterisk (\*) and species which show narrower than expected distributions are marked with a plus (+).

248 sweeps in contact zone species than in sympatric pairs. We find no corresponding  
249 difference in nuclear diversity between contact zones and sympatric pairs ( $t =$   
250  $-0.0139$ ,  $df = 31.539$ ,  $p = 0.506$ ) and, in general, no correlation between nuclear  
251 and *mt* diversity (Figure S3 and [66]).

252 Our estimates for the lower bound of sister species divergence differ sub-  
253 stantially from the ages of the corresponding nodes in the Wiemers *et al.* [59]  
254 phylogeny for individual pairs (Fig S4). This is unsurprising given that the lat-  
255 ter are largely informed by mtDNA data. However, perhaps surprisingly (given  
256 the difference in calibration, data and inference approach) our estimates are not  
257 consistently older or younger than the node ages of Wiemers *et al.* [59] ( $t_{paired}$   
258  $= -1.105$ ,  $df = 17$ ,  $p = 0.285$ ). A standardized major axis regression shows  
259 a significant relationship (R squared = 0.3657,  $p = 0.00780$ ), a slope (1.377)  
260 not different from one ( $r = 0.3786$ ,  $p = 0.121$ ) and an intercept ( $-0.5750$ ) not  
261 different from zero (Fig S4).

## 262 Genetic diversity does not correlate with relative range size

263 Genetic diversity at 4D sites within all 36 species ranged from 0.32% to 4.2%  
264 with a mean of 1.5%. Given the *H. melpomene* mutation rate of  $\mu = 2.9 * 10^{-9}$   
265 [62], these correspond to effective population sizes ranging from 280,000  
266 to 3,600,000 with a mean of 1,300,000. Mackintosh *et al.* [66] tested whether  
267 neutral genetic diversity across European butterflies correlates with geographic  
268 range and found no significant relation across 38 taxa. Our sampling of species  
269 pairs allows for a simpler, alternative test of the potential relationship between  
270 diversity and range size using sister-clade comparisons which are less sensitive  
271 to potential phylogenetic correlates and uncertainty in current range estimates.  
272 If diversity is a function of range size, we expect the species in a pair with the  
273 larger range to have higher genetic diversity than the species with the smaller

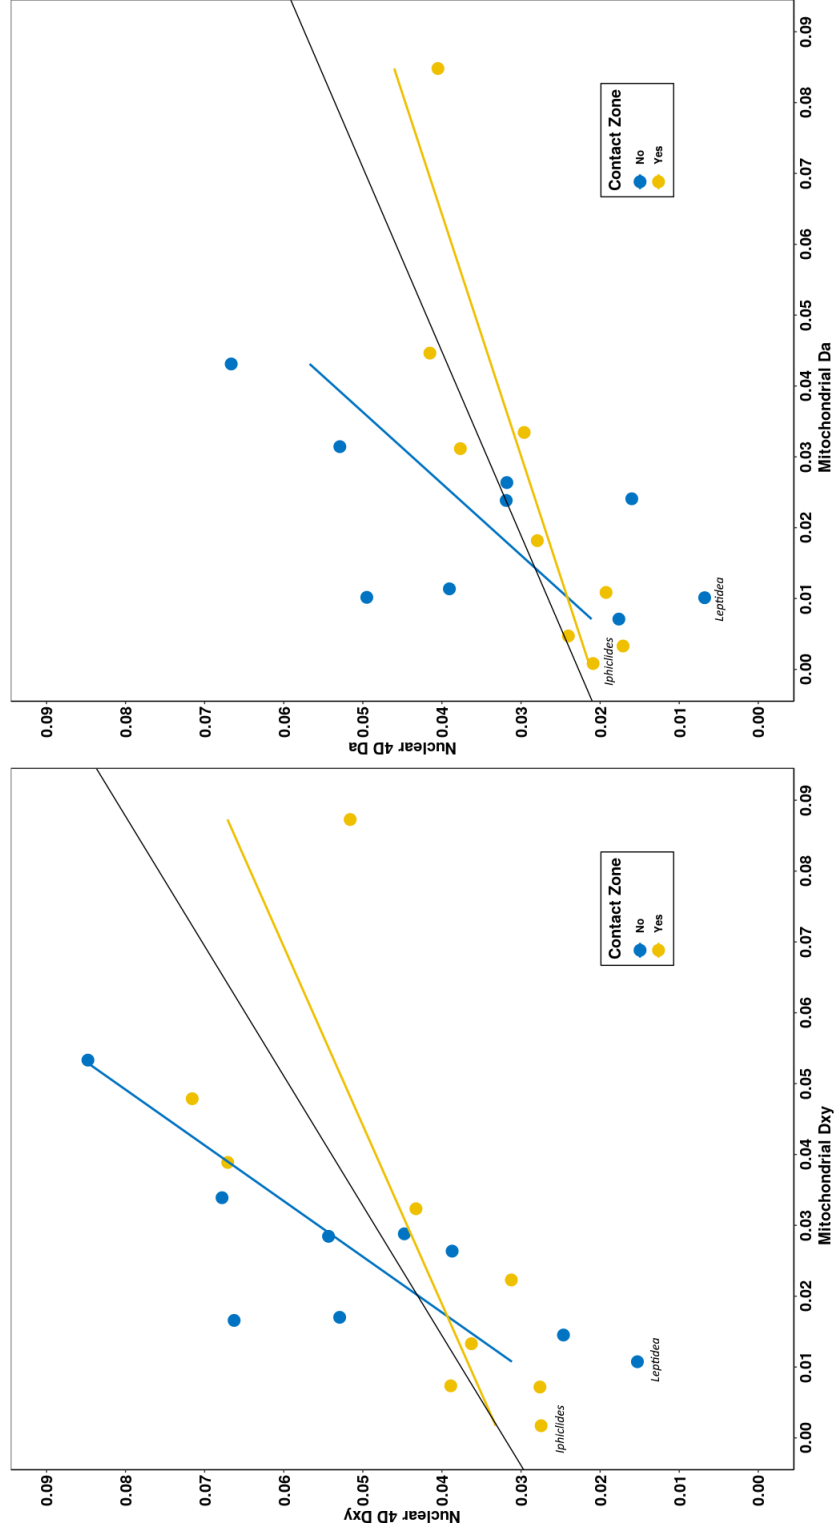

Figure 4: Mitochondrial  $d_{xy}$  (left) and  $d_a$  (right) are weakly correlated with mean nuclear divergence ( $R^2 = 0.3565$  and  $0.2732$ , respectively). The coloured lines show the interactions for pairs that form contact zones and sympatric pairs. The two highlighted pairs (*Iphiclistes* and *Leptidea*) have known *Wolbachia* associated sweeps and low  $mt \pi$  (and so high  $mt d_a$ ).



274 range. We indeed find a difference in the expected direction, 0.0167 (SD =  
275 0.0114) vs. 0.0139 (SD = 0.00865), although the effect of relative range size is  
276 not significant ( $t_{paired} = 1.127$ ,  $df = 17$ ,  $p = 0.138$ , Figure S2).

## 277 Discussion

278 We quantify and compare genome-wide divergence across 18 sister species pairs  
279 of European butterfly. Simple estimates for the onset of species divergence based  
280 on net gene divergence ( $d_a$ ) and a direct mutation rate estimate for butterflies  
281 suggest that the majority of pairs have diverged before the onset of Pleistocene  
282 glacial cycling. Our results support the notion that the modern contact zones  
283 are secondary between species which started diverging earlier, in the Pliocene.  
284 Thus, even though the current ranges of many taxon pairs reflect glacial refugia,  
285 their divergence is unlikely to have been initiated by vicariance into these refugia  
286 during the Pleistocene, as envisaged by the species-pump hypothesis and earlier  
287 phylogeographic studies based on *mt* and allozyme data [e.g. 27, 28, 67–69].  
288 Given the Pliocene age of most of the sister species, it is unsurprising that  
289 we do not find any relationship between current range overlap and the time  
290 since divergence. Specifically, species pairs which form contact zones are not  
291 significantly younger than pairs that broadly overlap in range. However, we do  
292 find that strong signals of post-divergence gene flow are restricted to contact-  
293 zone pairs. It is likely that the absence of sympatric pairs with significant gene  
294 flow reflects a simple survivorship bias: any such pairs with significant gene  
295 flow might have already collapsed. Similarly, we are more likely to observe old  
296 contact zones pairs that have survived repeated glacial cycles.

297 Our finding that *mt* divergence between sister species is only weakly cor-  
298 related with mean nuclear divergence and that net *mt* divergence is greater in  
299 contact zone than sympatric species pairs (as a result of reduced genetic di-

300 versity), suggests that the former are subject to more frequent selective sweeps  
301 linked to mitochondria. Such sweeps may be acting on *mt* variation directly  
302 or, indirectly, through maternally inherited genomes or chromosomes (e.g. *Wol-*  
303 *bachia* [43] and the W chromosome) and have been documented in a number  
304 of Lepidopteran systems [45, 70–73]. Our results raise the intriguing possibil-  
305 ity that such sweeps could play a role in the build-up of reproductive isolation  
306 [74–76].

### 307 Sources of dating uncertainty and bias

308 Since we have assumed a simple demographic null model of species divergence  
309 without gene flow, our estimates of divergence between sister species should be  
310 interpreted as lower bounds. Any gene flow between sister species would reduce  
311  $d_a$  and species divergence estimates both by decreasing  $d_{xy}$  and by potentially  
312 increasing  $\pi$  (in the recipient species).

313 Calibrating absolute split times involves assumptions about both the gener-  
314 ation time and the mutation rate. We have assumed that the mutation rate is  
315 the same (per generation) across all species pairs, irrespective of their genera-  
316 tion time and applied a direct lab estimate of the per generation mutation rate  
317 from the tropical butterfly *H. melpomene*. Whilst there is good evidence for a  
318 generation time effect on mutation rates in invertebrates [77], our assumption  
319 of a simple linear relationship between generation time and sequence divergence  
320 may be overly simplistic. In particular, if temperate European species, which  
321 have longer average generation times than *H. melpomene*, have a higher per gen-  
322 eration mutation rate, we would have overestimated the age of sister species.  
323 In contrast, given that generation time varies between populations, species, and  
324 likely through time, our use of the average minimum generation time (within  
325 each pair) as a proxy for the long term generation time is conservative: assum-

326 ing longer average generation times would yield even older estimates species  
327 divergence. Given these uncertainties in calibration and the fact that we have  
328 ignored the measurement error in the *H. melpomene* mutation rate, our ab-  
329 solute time estimates should be interpreted with caution until direct mutation  
330 rate estimates for temperate butterflies are available. However, in the absence of  
331 information on mutation rate heterogeneity across Lepidoptera, our main con-  
332 clusion that most sister species of European butterflies predate the Pleistocene  
333 would still hold if mutation rates were higher by a factor of two. Given that  
334 the direct estimate of the *de novo* mutation rate in *H. melpomene* is similar  
335 to spontaneous mutation rate estimates for other insects [62], this seems ex-  
336 tremely unlikely. While our split time estimates may be surprising in light of  
337 previous phylogeographic studies on European butterflies based on *mt* diversity  
338 [e.g. 27, 28, 67–69], our divergence estimate for *Leptidea reali* and *L. sinapis*,  
339 the youngest and only pair for which divergence has been estimated based on  
340 genome-wide data before, is lower than previous estimates [58].

### 341 **Glacial cycling and the Messinian salinity crisis**

342 Taking our estimates of species splits at face value, the species divergence for  
343 10 species pairs predates the onset of Pleistocene glacial cycling > 2.6 MYA  
344 [78]. This is not compatible with the idea that, overall, speciation processes in  
345 European butterflies were initiated by the range shifts into and out of glacial  
346 refugia during the Pleistocene. However, our age estimates do of course not rule  
347 out that Pleistocene range shifts and vicariance may have played a role in com-  
348 pleting speciation processes, e.g. through reinforcement and/or the evolution of  
349 intrinsic incompatibilities.

350 An event which may have contributed to speciation in Europe before the on-  
351 set of Pleistocene glacial cycling is the Messinian salinity crisis (MSC)  $\approx$  6MYA

352 during which the Mediterranean greatly reduced in size [79]. As a consequence,  
353 Europe and Africa were connected across the strait of Gibraltar until the Zan-  
354 clean flood when the Atlantic reconnected to the re-expanding Mediterranean  
355 sea. This must have created a strong dispersal barrier for many species that pre-  
356 viously had continuous distributions around the Mediterranean basin and may  
357 have initiated the divergence into the east and west European/Mediterranean  
358 sister taxa. While the MSC has been considered as a plausible trigger of species  
359 divergence in amphibians [57] and reptiles [80], it has rarely been invoked  
360 for Lepidopterans (see recent insights into mitochondrial lineages in *Melitaea*  
361 *didyma* [41]) which have assumed to have been younger.

## 362 **Do European butterfly species fall within the grey zone of** 363 **speciation?**

364 Roux *et al.* [81] conducted a comparative analysis of divergence and gene flow  
365 across 61 pairs of sister taxa and found that pairs with net synonymous diver-  
366 gence of  $> 2\%$  rarely show evidence for ongoing gene flow. In contrast, taxa  
367 with  $d_a$  between  $0.5\%$  and  $2\%$  may show some evidence for ongoing gene flow  
368 and ambiguous species status, suggesting that speciation may be incomplete.  
369 While our five youngest pairs (*Brenthis*, *Colias*, *Leptidea*, *Pseudophilotes*, and  
370 *Pyrgus*) fall in this “grey zone of speciation”, we only find evidence for gene flow  
371 in one (*Pseudophilotes*). In contrast, we find a clear gene flow signal in three  
372 more diverged pairs: *Iphiclides*,  $d_a = 2.09\%$ ; *Zerynthia*,  $d_a = 2.79\%$ ; *Pontia*,  $d_a$   
373  $= 4.05\%$ . However, as we have focused sampling on “good species” *sensu* Mallet  
374 [60] we are missing the recent (intraspecific) end of the continuum of divergence  
375 described by Roux *et al.* [81]. It will be interesting to test whether intraspecific  
376 split times between refugial populations of butterflies are concentrated in the  
377 mid Pleistocene, a patterns that has been found for other herbivorous insect

378 and their parasitoids [82]. Nevertheless, our contrasting finding of both gene  
379 flow signals in old contact zone pairs (e.g. *Pontia*) and no evidence for gene  
380 flow (and complete sympatry) in the youngest pair (*Leptidea*) suggests that the  
381 "grey zone of speciation" may be very wide indeed for European butterflies.

## 382 **Outlook**

383 Given the challenges of demographic inference from transcriptome data (in par-  
384 ticular the high relative recombination rate in butterflies), we have deliberately  
385 resisted the temptation to fit explicit models of demographic history. Our goal  
386 was instead to establish robust and comparable lower bounds for the age of  
387 butterfly sister species in Europe. Being based on mean divergence at 4D sites,  
388 these lower bounds for species ages make minimal assumptions and unaffected  
389 by recombination. Likewise, we have decided to focus on a simple and conser-  
390 vative diagnostic for introgression.

391 Delving deeper into the speciation process will require examination of whole-  
392 genome data from larger samples under realistic models of speciation history.  
393 Fitting explicit models of speciation, ideally including both selection and gene  
394 flow, would not only refine estimates for the onset of divergence between re-  
395 cent species but also allow us to quantify the likely end-points (if present) of  
396 speciation processes. While it is straightforward to determine lower bounds for  
397 the onset of divergence under simple null models that assume no gene flow,  
398 as we have done here, estimating upper bounds of species divergence in the  
399 presence of gene flow is a much harder inference problem. As pointed out by  
400 Barton [5], the initial time of divergence may be unknowable given that post-  
401 divergence gene flow eventually erases all information about this parameter.  
402 Although current and historic levels of gene flow between European butterfly  
403 sister species remain to be determined, our results already suggest that their

404 speciation histories are older and potentially slower than had been assumed by  
405 previous phylogeographic studies based on mt data. It will be fascinating to  
406 understand the evolutionary forces that drive both this general pattern as well  
407 as its exceptions, in particular, the selection responsible for the origin of very  
408 young but complete (in terms of reproductive isolation) cryptic species such as  
409 *Leptidea* [83] and the recently discovered *Spialia rosae* [84].

## 410 **Methods**

### 411 **Sampling and molecular work**

412 Field sampling was conducted over multiple seasons (2016-2019) at several lo-  
413 cations across Southern and Central Europe (Portugal, Spain, France, Hungary,  
414 Romania). Samples were hand-netted in the field, flash-frozen in a liquid nitro-  
415 gen dry shipper (Voyageur 12) and stored at  $-70^{\circ}\text{C}$  shortly after capture (wings  
416 were retained for identification). Specimen identifications were confirmed for 22  
417 samples by DNA barcoding using LepF/R primers [85] and existing reference  
418 databases [49]. We were unable to obtain fresh material for *Erebia euryale* and  
419 *E. ligea*, and *Fabriciana adippe* and *F. niobe* (two remaining sister pairs meeting  
420 our sampling criteria).

421 RNA extractions were prepared by dividing individuals bilaterally and us-  
422 ing one side. RNA was extracted following a hybrid protocol by homogenising  
423 samples with TRIzol, then digesting DNA and eluting RNA using the Purelink  
424 RNA Purification kit protocol. Extracted RNA was submitted to Edinburgh  
425 Genomics to generate automated TruSeq stranded mRNA-seq libraries. Li-  
426 braries were sequenced on an Illumina NovaSeq platform using 100PE reads  
427 after poly-A selection. Transcriptome data for 66 samples (across 38 species)  
428 were generated and analysed previously by Mackintosh *et al.* [66]. Of these, 26

429 samples from 13 species are included in the present analysis (Table S1).

## 430 **Generating transcriptome assemblies**

431 Reads were processed following the pipeline developed by [66]. Reads were  
432 trimmed and checked for quality using FastQC v0.11.8 [86] both before and  
433 after trimming with FastP v0.20.0 [87] using MultiQC v1.7 [88] to visualise  
434 the results. Trimmed reads were assembled into *de novo* transcriptomes using  
435 Trinity v2.8.5 [89], pooling data-sets by species.

436 Transcriptome completeness was assessed using BUSCO v3 [90] with the *in-*  
437 *sectaodb9* database. Transcripts were processed with Transdecoder v5.5 [91],  
438 and retained based on BLAST [92] and HMMER [93] homology search re-  
439 sults. Read pairs from each sample were mapped against respective species  
440 transcriptome, composed of the longest isoform of each complete protein-coding  
441 transcript, using BWA MEM [94]. Coverage at mapped sites was determined  
442 using GATK CallableLoci v3.5 [95]. Sites with at least 10 fold coverage and  
443 a minimum mapping quality of 1 in each sample were considered suitable for  
444 variant calling. Callable loci were intersected between individuals using BED-  
445 Tools v2.28 [96], variants were called using FreeBayes v1.3.1 [97] and filtered for  
446 unbalanced SNPs and missing genotypes ( $RPL \geq 1$   $RPR \geq 1$   $SAF \geq 1$   $SAR \geq 1$   
447  $N\_MISSING=0$ ) using BCFtools filter v0.1.19 [98].

448 To generate comparable data-sets across all samples, Orthofinder v2.3.3 [99]  
449 was used to cluster proteins into orthogroups. Orthogroups were labelled single-  
450 copy orthologues (SCOs) if one protein of each taxon was present. Genus single-  
451 copy orthologues (GSCOs) were diagnosed based on the presence of single copy  
452 proteins within the focal pair. Protein sequences from each orthogroup were  
453 used to align equivalent DNA sequences using Translatorx v12.0 [100].

454 Data were generated for 36 species (18 sister pairs) from five families. For

455 16 pairs, data were generated from 665 SCOs from high-quality transcriptomes  
456 (BUSCO scores > 90%). For the pair of *Zerynthia* species (one of which, *Zeryn-*  
457 *thia polyxena*, was sampled as a larva) GSCOs (5000 orthologues) were used to  
458 avoid restricting the SCOs for other pairs. With the exception of the *Zerynthia*  
459 pair, all analyses are based on SCO to enforce consistent comparisons across  
460 pairs. While the SCO data-set is much smaller than the pair GSCO data-sets  
461 and likely enriched for conserved and highly expressed genes, this has very lit-  
462 tle impact on estimates of divergence and diversity at fourfold degenerate (4D)  
463 sites, as these are highly correlated (>99%, Figure SS1 and [66]).

## 464 **Estimating gene and population divergence**

465 For each species pair, we calculated  $d_{xy}$  at 4D sites using sequence alignments for  
466 one or two diploid samples from each species where available. This calculation is  
467 implemented in the script `orthodiver.py` ([www.github.com/samebdon/orthodiver](http://www.github.com/samebdon/orthodiver)).

468 Information on generation times was compiled from Collins Butterfly Guide  
469 [47] (Table 1). For species in which generation times vary with latitude, we as-  
470 sumed the minimum generation time of the southern part of the range. This is  
471 a reasonable long term average, given that European glacial refugia are located  
472 around the Mediterranean, which renders our estimates of divergence conserva-  
473 tive.

474 We considered the distribution of pairwise differences in blocks of a fixed  
475 length of 4D sites. The block size for each pair was selected to give an average  
476 of three pairwise differences between sister species per block. To examine how  
477 well the distribution of pairwise differences of each species pair fits a null model  
478 of divergence without gene flow, we compared the observed distribution to the  
479 analytic expectation (assuming  $T$  and ancestral  $N_e$  estimated from mean  $\pi$   
480 and  $d_{xy}$ ). In the absence of recombination within blocks, the distribution of



481 pairwise differences has been derived by [63, 64]. However, given the high rate of  
482 recombination (relative to mutation) in butterflies [101, 102] and the substantial  
483 span of 4D blocks, we expect the empirical distribution to be narrower than this  
484 analytic expectation. To test whether species pairs show evidence for gene flow,  
485 we compared the observed distributions to analytic expectations under a model  
486 of strict divergence without gene flow (given estimates of  $T$  and ancestral  $N_e$   
487 obtained from  $d_a$  and mean  $\pi$ ): we re-sampled (without replacement) 10,000  
488 data-sets of equal size as the observed data-sets from the expected distribution of  
489 each species. We then tested whether the likelihood of the observed distribution  
490 of pairwise differences falls within the distribution of likelihoods obtained from  
491 re-sampled data-sets.

## 492 **Estimating range size and overlap**

493 Geographic ranges were quantified as follows: we obtained occurrence data over  
494 Europe for all the studied species with a resolution of 60' latitude and 30'  
495 longitude by critically revising the data from the Distribution Atlas of European  
496 Butterflies and Skippers [103] and by adding data from Roger Vila's collection  
497 stored at Institut de Biologia Evolutiva (Barcelona). To calculate range overlap  
498 we applied the biodecrypt function [51] of the recluster R package [104]. This  
499 function computes alpha hull with a given concavity ( $\alpha$ ) and evaluates the area  
500 of overlap among pairs of species. We used  $\alpha = 2$  and  $\alpha = 3$  for species  
501 with discontinuous and continuous distributions in Europe respectively. We  
502 quantified the range overlap of each species pair and calculated the degree of  
503 sympatry as:

$$504 \quad \text{Sympatry} = \frac{\text{Overlap}_{A,B}}{\min(\text{Area}_{A,B})} \quad (1)$$

representing the fraction of the distribution area of the less widespread

505 species which is involved in the overlap. In the following, we consider sister  
506 pairs with a degree of sympatry 0.2 contact zone pairs and those with a degree  
507 of sympatry  $> 0.2$  sympatric. However, since there are only two species pairs  
508 with intermediate levels of sympatry ( $> 0.2$  and  $< 0.7$ ), our comparisons of  
509 contact zone and sympatric pairs are robust to a wide range of thresholds.

## 510 Mitochondrial diversity and divergence

511 Sequence alignments for the COI barcode locus were obtained from the BOLD  
512 database [105] for all 18 sister species pairs. Sequence alignments are deposited  
513 in the dryad repository xxx. For each species, we included all available sequence  
514 records from Europe. Mean pairwise diversity ( $\pi$ ) within species and divergence  
515 ( $d_{xy}$ ) across all sites were computed using DnaSP [106].

516 We obtained the average gene divergence time for each pair from the mul-  
517 tilocus calibrated phylogeny of European butterflies of Wiemers *et al.* [59] as  
518 half of patristic distances calculated with distTips function of the adephylo R  
519 package [107]. The correlation between our estimates of species divergences and  
520 these node ages was explored with standardized major axis (SMA) regression,  
521 using the ‘sma’ function of the ‘smatr’ R package. SMA estimates slope and  
522 intercept and tests if slope differs from one.

## 523 Acknowledgements

524 This work was supported by an ERC starting grant (ModelGenomLand). SE  
525 is supported by an EastBio studentship from the British Biological Sciences  
526 Research Council (BBSRC). KL is supported by a fellowship from the Natu-  
527 ral Environment Research Council (NERC, NE/L011522/1). VD is supported  
528 by the Academy of Finland (Academy Research Fellow, decision no. 328895).  
529 RV acknowledges support from project PID2019-107078GB-I00 (AEI, Spain /

530 ERDF, EU). LD acknowledges support from project "Ricerca e conservazione  
531 sugli Impollinatori dell'Arcipelago Toscano e divulgazione sui Lepidotteri del  
532 parco". AH is supported by a Biotechnology and Biological Sciences Research  
533 Council (BBSRC) David Phillips Fellowship (BB/N020146/1). We thank Alex  
534 Mackintosh and Simon Martin for helpful comments on an earlier draft, Richard  
535 Lewington for permission to reproduce his butterfly illustrations Andres de la  
536 Filia for help in the molecular lab and Edinburgh Genomics for sequencing.

### 537 **Compliance with ethical standards**

538 Field sampling of butterflies was conducted in compliance with the School of  
539 Biological Sciences Ethics Committee at the University of Edinburgh and the  
540 ERC ethics review procedure. Permissions for field sampling were obtained  
541 from the Generalitat de Catalunya (SF/639), the Gobierno de Aragon (IN-  
542 AGA/500201/24/2018/0614 to Karl Wotton) and the Gobierno del Principado  
543 de Asturias (014252). The samples for *Z. cassandra* from Elba were collected  
544 after permission from the Italian Ministero dell'Ambiente e della Tutela del  
545 Territorio e del Mare (Prot. 0012493/ PNM 24/06/2015).

### 546 **References**

- 547 [1] Mayr, E. Ecological factors in speciation. *Evolution* **1**, 263–288 (1947).
- 548 [2] Bateson, W. *Heredity and variation in modern lights* (Cambridge Univer-  
549 sity Press, 1909).
- 550 [3] Dobzhansky, T. *Genetics and the Origin of Species*. 11 (Columbia uni-  
551 versity press, 1937).
- 552 [4] Muller, H. Isolating mechanisms, evolution, and temperature. In *Biol.*  
553 *Symp.*, vol. 6, 71–125 (1942).

- 554 [5] Barton, N. H. & Hewitt, G. M. Analysis of hybrid zones. *Annual review*  
555 *of Ecology and Systematics* **16**, 113–148 (1985).
- 556 [6] Pigot, A. L. & Tobias, J. A. Species interactions constrain geographic  
557 range expansion over evolutionary time. *Ecology letters* **16**, 330–338  
558 (2013).
- 559 [7] Weir, J. T. & Price, T. D. Limits to speciation inferred from times to  
560 secondary sympatry and ages of hybridizing species along a latitudinal  
561 gradient. *The American Naturalist* **177**, 462–469 (2011).
- 562 [8] Coyne, J. A. & Orr, H. A. Speciation. Sunderland, MA (2004).
- 563 [9] Hewitt, G. M. Some genetic consequences of ice ages, and their role in  
564 divergence and speciation. *Biological journal of the Linnean Society* **58**,  
565 247–276 (1996).
- 566 [10] Hewitt, G. M. Speciation, hybrid zones and phylogeography—or seeing  
567 genes in space and time. *Molecular ecology* **10**, 537–549 (2001).
- 568 [11] Hofreiter, M. & Stewart, J. Ecological change, range fluctuations and  
569 population dynamics during the Pleistocene. *Current Biology* R584–R594.
- 570 [12] Dennis, R., Williams, W. & Shreeve, T. A multivariate approach to the  
571 determination of faunal structures among European butterfly species (*Lep-*  
572 *idoptera: Rhopalocera*). *Zoological Journal of the Linnean Society* **101**,  
573 1–49 (1991).
- 574 [13] Hewitt, G. M. Post-glacial re-colonization of European biota. *Biological*  
575 *journal of the Linnean Society* **68**, 87–112 (1999).
- 576 [14] Hewitt, G. M. Quaternary phylogeography: the roots of hybrid zones.  
577 *Genetica* **139**, 617–638 (2011).

- 578 [15] Kruuk, L. E., Gilchrist, J. S. & Barton, N. H. Hybrid dysfunction in  
579 fire-bellied toads (*Bombina*). *Evolution* **53**, 1611–1616 (1999).
- 580 [16] Boursot, P. *et al.* Origin and radiation of the house mouse: mitochondrial  
581 DNA phylogeny. *Journal of Evolutionary Biology* **9**, 391–415 (1996).
- 582 [17] Butlin, R. & Hewitt, G. A hybrid zone between *Chorthippus parallelus*  
583 *parallelus* and *Chorthippus parallelus erythropus* (Orthoptera: Acrididae):  
584 behavioural characters. *Biological Journal of the Linnean Society* **26**, 287–  
585 299 (1985).
- 586 [18] Barton, N. The fitness of hybrids between two chromosomal races of the  
587 grasshopper *Podisma pedestris*. *Heredity* **45**, 47–59 (1980).
- 588 [19] Bacilieri, R., Ducousso, A., Petit, R. J. & Kremer, A. Mating system and  
589 asymmetric hybridization in a mixed stand of European oaks. *Evolution*  
590 **50**, 900–908 (1996).
- 591 [20] Skibinski, D. & Beardmore, J. A genetic study of intergradation between  
592 *Mytilus edulis* and *Mytilus galloprovincialis*. *Experientia* **35**, 1442–1444  
593 (1979).
- 594 [21] Schmitt, T. Molecular biogeography of Europe: Pleistocene cycles and  
595 postglacial trends. *Frontiers in zoology* **4**, 11 (2007).
- 596 [22] Dapporto, L. *et al.* Integrating three comprehensive data sets shows  
597 that mitochondrial DNA variation is linked to species traits and paleo-  
598 geographic events in European butterflies. *Molecular Ecology Resources*  
599 **19**, 1623–1636 (2019).
- 600 [23] Haffer, J. Speciation in Amazonian forest birds. *Science* **165**, 131–137  
601 (1969).

- 602 [24] Avise, J. C., Walker, D. & Johns, G. C. Speciation durations and Pleis-  
603 tocene effects on vertebrate phylogeography. *Proceedings of the Royal*  
604 *Society of London. Series B: Biological Sciences* **265**, 1707–1712 (1998).
- 605 [25] Bernatchez, L. & Wilson, C. C. Comparative phylogeography of nearctic  
606 and palearctic fishes. *Molecular ecology* **7**, 431–452 (1998).
- 607 [26] Hewitt, G. The genetic legacy of the Quaternary ice ages. *Nature* **405**,  
608 907–913 (2000).
- 609 [27] Schmitt, T. Molecular biogeography of Europe: Pleistocene cycles and  
610 postglacial trends. *Frontiers in zoology* **4**, 11 (2007).
- 611 [28] Habel, J. C., Meyer, M., El Mousadik, A. & Schmitt, T. Africa goes eu-  
612 rope: The complete phylogeography of the marbled white butterfly species  
613 complex *Melanargia galathea/M. lachesis* (*Lepidoptera: Satyridae*). *Or-*  
614 *ganisms Diversity & Evolution* **8**, 121–129 (2008).
- 615 [29] Schoville, S. D., Roderick, G. K. & Kavanaugh, D. H. Testing the ‘Pleis-  
616 tocene species pump’ in alpine habitats: lineage diversification of flightless  
617 ground beetles (*Coleoptera: Carabidae: Nebria*) in relation to altitudinal  
618 zonation. *Biological Journal of the Linnean Society* **107**, 95–111 (2012).
- 619 [30] Klicka, J. & Zink, R. M. The importance of recent ice ages in speciation:  
620 A failed paradigm. *Science* **277**, 1666–1669 (1997).
- 621 [31] Spooner, L. & Ritchie, M. An unusual phylogeography in the bushcricket  
622 *Ephippiger ephippiger* from southern France. *Heredity* **97**, 398–408 (2006).
- 623 [32] Abbott, R. J. *et al.* Molecular analysis of plant migration and refugia in  
624 the arctic. *Science* **289**, 1343–1346 (2000).
- 625 [33] Chesson, R. T. & Zink, R. M. Modes of speciation in birds: a test of  
626 Lynch’s method. *Evolution* **48**, 490–497 (1994).

- 627 [34] Barraclough, T. G. & Vogler, A. P. Detecting the geographical pattern of  
628 speciation from species-level phylogenies. *The American Naturalist* **155**,  
629 419–434 (2000).
- 630 [35] Zachary Nolen, X. *et al.* Historical isolation facilitates species radiation  
631 by sexual selection: insights from *Chorthippus* grasshoppers. *Authorea*  
632 **DOI: 10.22541/au.159003547.70785237** (2020).
- 633 [36] Galtier, N., Nabholz, B., Glémin, S. & Hurst, G. Mitochondrial DNA  
634 as a marker of molecular diversity: a reappraisal. *Molecular ecology* **18**,  
635 4541–4550 (2009).
- 636 [37] Knowles, L. L. & Carstens, B. C. Delimiting species without monophyletic  
637 gene trees. *Systematic biology* **56**, 887–895 (2007).
- 638 [38] Wang, Y. & Hey, J. Estimating divergence parameters with small samples  
639 from a large number of loci. *Genetics* **184**, 363–379 (2010).
- 640 [39] Toews, D. P. & Brelsford, A. The biogeography of mitochondrial and  
641 nuclear discordance in animals. *Molecular Ecology* **21**, 3907–3930 (2012).
- 642 [40] Wiemers, M., Stradomsky, B. V. & Vodolazhsky, D. I. A molecular phy-  
643 logeny of *Polyommatus s. str.* and *Plebicula* based on mitochondrial COI  
644 and nuclear ITS2 sequences (*Lepidoptera: Lycaenidae*). *European Journal*  
645 *of Entomology* **107**, 325 (2010).
- 646 [41] Dincă, V., Lee, K. M., Vila, R. & Mutanen, M. The conundrum of species  
647 delimitation: a genomic perspective on a mitogenetically super-variable  
648 butterfly. *Proceedings of the Royal Society B* **286**, 20191311 (2019).
- 649 [42] Hinojosa, J. C. *et al.* A mirage of cryptic species: Genomics uncover  
650 striking mitonuclear discordance in the butterfly *Thymelicus sylvestris*.  
651 *Molecular ecology* **28**, 3857–3868 (2019).

- 652 [43] Jiggins, F. M. Male-killing *Wolbachia* and mitochondrial DNA: Selective  
653 sweeps, hybrid introgression and parasite population dynamics. *Genetics*  
654 **164**, 5–12 (2003).
- 655 [44] Hurst, G. D. & Jiggins, F. M. Problems with mitochondrial DNA as a  
656 marker in population, phylogeographic and phylogenetic studies: the ef-  
657 fects of inherited symbionts. *Proceedings of the Royal Society B: Biological*  
658 *Sciences* **272**, 1525–1534 (2005).
- 659 [45] Martin, S. H. *et al.* Whole-chromosome hitchhiking driven by a male-  
660 killing endosymbiont. *PLoS biology* **18**, e3000610 (2020).
- 661 [46] Kudrna, O. *Distribution of butterflies and skippers in Europe: (Lepi-*  
662 *doptera: Rhopalocera, Grypocera): 24 years mapping European butterflies*  
663 *(1995-2019): final report* (Spolecnost pro Ochranu Motylu (SOM), 2019).
- 664 [47] Tolman, T. & Lewington, R. *Collins British butterfly guide* (Collins,  
665 2013).
- 666 [48] Wiemers, M. *et al.* An updated checklist of the european butterflies (*Lep-*  
667 *doptera, Papilionoidea*). *ZooKeys* **811**, 9–45 (2018).
- 668 [49] Dincă, V. *et al.* DNA barcode reference library for Iberian butterflies  
669 enables a continental-scale preview of potential cryptic diversity. *Scientific*  
670 *reports* **5**, 12395 (2015).
- 671 [50] Vodă, R., Dapporto, L., Dincă, V. & Vila, R. Why do cryptic species tend  
672 not to co-occur? a case study on two cryptic pairs of butterflies. *PloS one*  
673 **10**, e0117802 (2015).
- 674 [51] Platania, L. *et al.* Integrative analyses on western palearctic *Lasiommata*  
675 reveal a mosaic of nascent butterfly species. *Journal of Zoological System-*  
676 *atics and Evolutionary Research* (2020).



- 677 [52] Lorkovic, Z. 150 Jahre bis zur entdeckung der präimaginalstadien von  
678 *Spialia orbifer* hbn.(Lep., Hesperiiidae). *Acta Entomologica Yugoslavica*  
679 **9**, 67–70 (1973).
- 680 [53] Porter, A. H., Wenger, R., Geiger, H., Scholl, A. & Shapiro, A. M. The  
681 *Pontia daplidice-edusa* hybrid zone in northwestern Italy. *Evolution* **51**,  
682 1561–1573 (1997).
- 683 [54] Gaunet, A. *et al.* Two consecutive *Wolbachia*-mediated mitochondrial in-  
684 trogressions obscure taxonomy in palearctic swallowtail butterflies (*Lepi-*  
685 *doptera*, *Papilionidae*). *Zoologica Scripta* (2019).
- 686 [55] Habel, J. C. *et al.* Differentiation in the marbled white butterfly species  
687 complex driven by multiple evolutionary forces. *Journal of Biogeography*  
688 **44**, 433–445 (2017).
- 689 [56] Wohlfahrt, T. Vergleichende untersuchun gen über die gröÙe und form  
690 der augenflecken am analende der hinterflügel von *Iphichlides podalirius*  
691 *podalirius* (linnaeus, 1758) und *I. podalirius feisthamelii* (duponchel, 1832)  
692 **19**, 281–288 (1996).
- 693 [57] Nürnberger, B., Lohse, K., Fijarczyk, A., Szymura, J. M. & Blaxter, M. L.  
694 Para-allopatry in hybridizing fire-bellied toads (*Bombina bombina* and  
695 *B. variegata*): Inference from transcriptome-wide coalescence analyses.  
696 *Evolution* **70**, 1803–1818 (2016).
- 697 [58] Talla, V. *et al.* Rapid increase in genome size as a consequence of transpos-  
698 able element hyperactivity in wood-white (*Leptidea*) butterflies. *Genome*  
699 *Biology and Evolution* **9**, 2491–2505 (2017).
- 700 [59] Wiemers, M., Chazot, N., Wheat, C. W., Schweiger, O. & Wahlberg,

- 701 N. A complete time-calibrated multi-gene phylogeny of the European  
702 butterflies. *ZooKeys* **938**, 97 (2020).
- 703 [60] Descimon, H. & Mallet, J. Bad species. *Ecology of butterflies in Europe*  
704 **500**, 219 (2009).
- 705 [61] Nei, M. & Li, W. H. Mathematical model for studying genetic variation in  
706 terms of restriction endonucleases. *Proceedings of the National Academy*  
707 *of Sciences* **76**, 5269–5273 (1979).
- 708 [62] Keightley, P. D., Ness, R. W., Halligan, D. L. & Haddrill, P. R. Estima-  
709 tion of the spontaneous mutation rate per nucleotide site in a *Drosophila*  
710 *melanogaster* full-sib family. *Genetics* **196**, 313–320 (2014).
- 711 [63] Lohse, K., Harrison, R. J. & Barton, N. H. A general method for cal-  
712 culating likelihoods under the coalescent process. *Genetics* **189**, 977–987  
713 (2011).
- 714 [64] Wilkinson-Herbots, H. M. The distribution of the coalescence time and  
715 the number of pairwise nucleotide differences in a model of population  
716 divergence or speciation with an initial period of gene flow. *Theoretical*  
717 *population biology* **82**, 92–108 (2012).
- 718 [65] Wall, J. D. Estimating ancestral population sizes and divergence times.  
719 *Genetics* **163**, 395–404 (2003).
- 720 [66] Mackintosh, A. *et al.* The determinants of genetic diversity in butterflies.  
721 *Nature Communications* **10**, 3466 (2019).
- 722 [67] Lai, B.-C. G. & Pullin, A. S. Phylogeography, genetic diversity and con-  
723 servation of the large copper butterfly *Lycaena dispar* in Europe. *Journal*  
724 *of Insect Conservation* **8**, 27–36 (2004).

- 725 [68] Todisco, V., Gratton, P., Cesaroni, D. & Sbordoni, V. Phylogeography  
726 of *Parnassius apollo*: hints on taxonomy and conservation of a vulnerable  
727 glacial butterfly invader. *Biological Journal of the Linnean Society* **101**,  
728 169–183 (2010).
- 729 [69] Zinetti, F. *et al.* When the rule becomes the exception. no evidence of gene  
730 flow between two *Zerynthia* cryptic butterflies suggests the emergence of  
731 a new model group. *PLoS One* **8**, e65746 (2013).
- 732 [70] Graham, R. I. & Wilson, K. Male-killing *Wolbachia* and mitochondrial  
733 selective sweep in a migratory African insect. *BMC evolutionary biology*  
734 **12**, 204 (2012).
- 735 [71] Kodandaramaiah, U., Simonsen, T. J., Bromilow, S., Wahlberg, N. &  
736 Sperling, F. Deceptive single-locus taxonomy and phylogeography: *Wol-*  
737 *bachia*-associated divergence in mitochondrial DNA is not reflected in mor-  
738 phology and nuclear markers in a butterfly species. *Ecology and Evolution*  
739 **3**, 5167–5176 (2013).
- 740 [72] Ritter, S. *et al.* *Wolbachia* infections mimic cryptic speciation in two par-  
741 asitic butterfly species, *Phengaris teleius* and *P. nausithous* (Lepidoptera:  
742 *Lycaenidae*). *PLoS One* **8**, e78107 (2013).
- 743 [73] Gaunet, A. *et al.* Two consecutive *Wolbachia*-mediated mitochondrial in-  
744 trogressions obscure taxonomy in palearctic swallowtail butterflies (*Lepi-*  
745 *doptera, Papilionidae*). *Zoologica Scripta* **48**, 507–519 (2019).
- 746 [74] Giordano, R., Jackson, J. J. & Robertson, H. M. The role of *Wolbachia*  
747 bacteria in reproductive incompatibilities and hybrid zones of *Diabrot-*  
748 *ica* beetles and *Gryllus* crickets. *Proceedings of the National Academy of*  
749 *Sciences* **94**, 11439–11444 (1997).

- 750 [75] Shoemaker, D. D., Katju, V. & Jaenike, J. *Wolbachia* and the evolu-  
751 tion of reproductive isolation between *Drosophila recens* and *Drosophila*  
752 *subquinaria*. *Evolution* **53**, 1157–1164 (1999).
- 753 [76] Rokas, I. *Wolbachia* as a speciation agent. *Trends in Ecology & Evolution*  
754 **15**, 44 (2000).
- 755 [77] Thomas, J. A., Welch, J. J., Lanfear, R. & Bromham, L. A generation  
756 time effect on the rate of molecular evolution in invertebrates. *Molecular*  
757 *Biology and Evolution* **27**, 1173–1180 (2010).
- 758 [78] Gibbard, P. & Head, M. J. The definition of the Quaternary system/era  
759 and the Pleistocene series/epoch. *Quaternaire* **20**, 125–133 (2009).
- 760 [79] Krijgsman, W., Hilgen, F., Raffi, I., Sierro, F. & Wilson, D. Chronology,  
761 causes and progression of the Messinian salinity crisis. *Nature* **400**, 652–  
762 655 (1999).
- 763 [80] Kaliontzopoulou, A., Pinho, C., Harris, D. J. & Carretero, M. A. When  
764 cryptic diversity blurs the picture: a cautionary tale from Iberian and  
765 north African *Podarcis* wall lizards. *Biological Journal of the Linnean*  
766 *Society* **103**, 779–800 (2011).
- 767 [81] Roux, C. *et al.* Shedding light on the grey zone of speciation along a  
768 continuum of genomic divergence. *PLoS biology* **14**, e2000234 (2016).
- 769 [82] Bunnefeld, L., Hearn, J., Stone, G. N. & Lohse, K. Whole-genome data  
770 reveal the complex history of a diverse ecological community. *Proceedings*  
771 *of the National Academy of Sciences of the United States of America* **115**,  
772 E6507–E6515 (2018).
- 773 [83] Talla, V. *et al.* Lack of gene flow: narrow and dispersed differentiation

- 774 islands in a triplet of *Leptidea* butterfly species. *Molecular ecology* **28**,  
775 3756–3770 (2019).
- 776 [84] Hernández-Roldán, J. L. *et al.* Integrative analyses unveil speciation linked  
777 to host plant shift in *Spialia* butterflies. *Molecular Ecology* **25**, 4267–4284  
778 (2016).
- 779 [85] Hajibabaei, M., Janzen, D. H., Burns, J. M., Hallwachs, W. & Hebert,  
780 P. D. DNA barcodes distinguish species of tropical *Lepidoptera*. *Proceed-*  
781 *ings of the National Academy of Sciences* **103**, 968–971 (2006).
- 782 [86] Andrews, S. *et al.* Fastqc: a quality control tool for high throughput  
783 sequence data (2010).
- 784 [87] Chen, S., Zhou, Y., Chen, Y. & Gu, J. fastp: an ultra-fast all-in-one fastq  
785 preprocessor. *Bioinformatics* **34**, i884–i890 (2018).
- 786 [88] Ewels, P., Magnusson, M., Lundin, S. & Käller, M. Multiqc: summarize  
787 analysis results for multiple tools and samples in a single report. *Bioin-*  
788 *formatics* **32**, 3047–3048 (2016).
- 789 [89] Grabherr, M. G. *et al.* Full-length transcriptome assembly from rna-seq  
790 data without a reference genome. *Nature biotechnology* **29**, 644 (2011).
- 791 [90] Simão, F. A., Waterhouse, R. M., Ioannidis, P., Kriventseva, E. V. &  
792 Zdobnov, E. M. Busco: assessing genome assembly and annotation  
793 completeness with single-copy orthologs. *Bioinformatics* **31**, 3210–3212  
794 (2015).
- 795 [91] Haas, B., Papanicolaou, A. *et al.* Transdecoder (find coding regions within  
796 transcripts) (2016).
- 797 [92] Camacho, C. *et al.* Blast+: architecture and applications. *BMC bioinform-*  
798 *atics* **10**, 421 (2009).

- 799 [93] Finn, R. D., Clements, J. & Eddy, S. R. Hmmer web server: interac-  
800 tive sequence similarity searching. *Nucleic acids research* **39**, W29–W37  
801 (2011).
- 802 [94] Li, H. Aligning sequence reads, clone sequences and assembly contigs with  
803 bwa-mem. *arXiv preprint arXiv:1303.3997* (2013).
- 804 [95] McKenna, A. *et al.* The genome analysis toolkit: a mapreduce framework  
805 for analyzing next-generation dna sequencing data. *Genome research* **20**,  
806 1297–1303 (2010).
- 807 [96] Quinlan, A. R. & Hall, I. M. Bedtools: a flexible suite of utilities for  
808 comparing genomic features. *Bioinformatics* **26**, 841–842 (2010).
- 809 [97] Garrison, E. & Marth, G. Haplotype-based variant detection from short-  
810 read sequencing. *arXiv preprint arXiv:1207.3907* (2012).
- 811 [98] Li, H. A statistical framework for snp calling, mutation discovery, as-  
812 sociation mapping and population genetical parameter estimation from  
813 sequencing data. *Bioinformatics* **27**, 2987–2993 (2011).
- 814 [99] Emms, D. M. & Kelly, S. Orthofinder: solving fundamental biases in  
815 whole genome comparisons dramatically improves orthogroup inference  
816 accuracy. *Genome biology* **16**, 157 (2015).
- 817 [100] Abascal, F., Zardoya, R. & Telford, M. J. TranslatorX: multiple alignment  
818 of nucleotide sequences guided by amino acid translations. *Nucleic Acids*  
819 *Research* **38**, W7–W13 (2010).
- 820 [101] Martin, S. H. *et al.* Natural selection and genetic diversity in the butterfly  
821 *Heliconius melpomene*. *Genetics* **203**, 525–541 (2016).

- 822 [102] Martin, S. H., Davey, J. W., Salazar, C. & Jiggins, C. D. Recombination  
823 rate variation shapes barriers to introgression across butterfly genomes.  
824 *PLoS biology* **17**, e2006288 (2019).
- 825 [103] Kudrna, O. *et al.* *Distribution atlas of butterflies in Europe* (Gesellschaft  
826 für Schmetterlingsschutz, 2011).
- 827 [104] Dapporto, L. *et al.* recluster: an unbiased clustering procedure for beta-  
828 diversity turnover. *Ecography* **36**, 1070–1075 (2013).
- 829 [105] Ratnasingham, S. & Hebert, P. D. Bold: The barcode of life data sys-  
830 tem (<http://www.barcodinglife.org>). *Molecular ecology notes* **7**, 355–364  
831 (2007).
- 832 [106] Librado, P. & Rozas, J. DnaSP v5: a software for comprehensive analysis  
833 of DNA polymorphism data. *Bioinformatics* **25**, 1451–1452 (2009).
- 834 [107] Jombart, T. & Dray, S. adephylo: exploratory analyses for the phyloge-  
835 netic comparative method. *Bioinformatics* **26**, 1907–1909 (2010).

<sup>836</sup> **Supplementary Information**



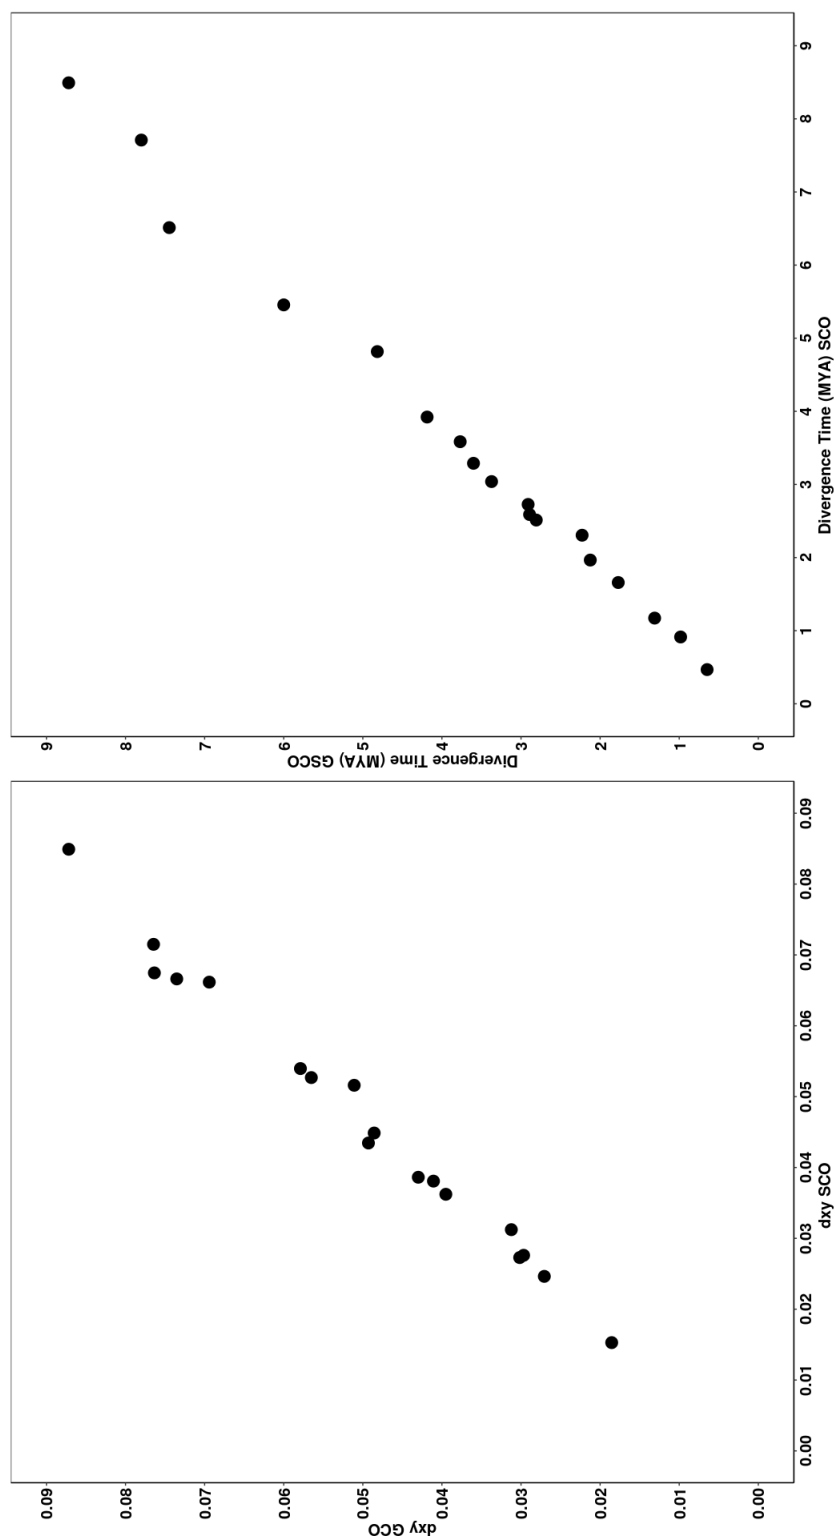

Figure S1: Left) Mean divergence ( $d_{xy}$ ) at 4D sites for 18 butterfly species pairs is highly similar at single copy orthologues that are present across all pairs (SCO) and single copy orthologues that are present in each pair/genus (GSCO). Right) Age estimates based on  $d_a$  are unaffected by the filtering of orthologues.

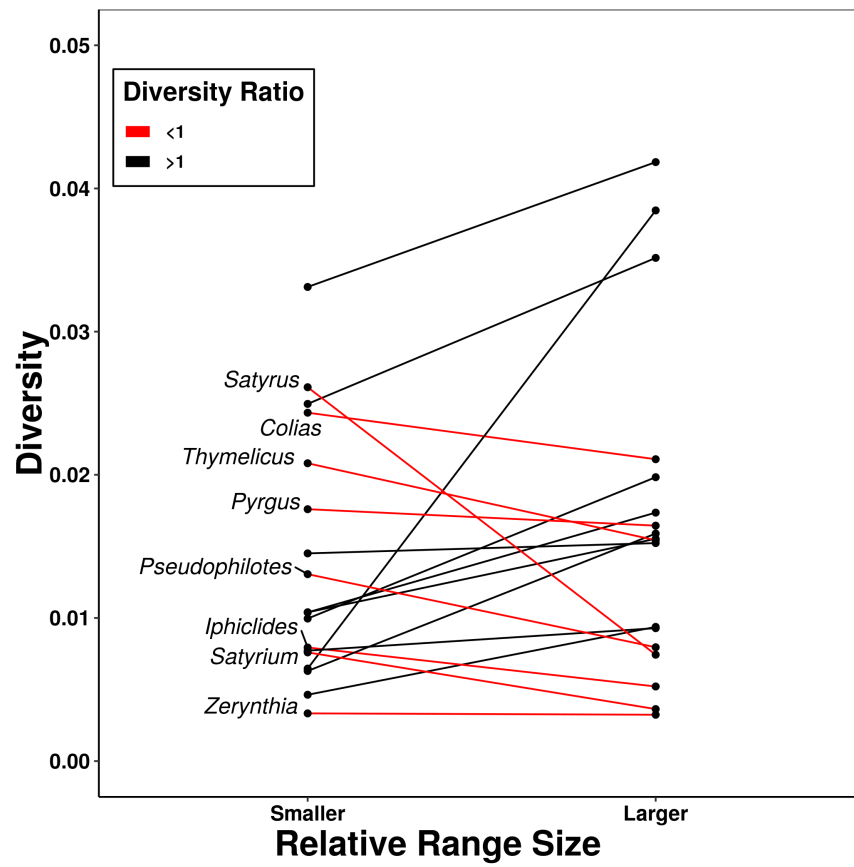

Figure S2: Mean diversity ( $\pi$ ) at 4D sites for 18 butterfly species pairs. In most (10) pairs, the species with the smaller range has lower  $\pi$ .

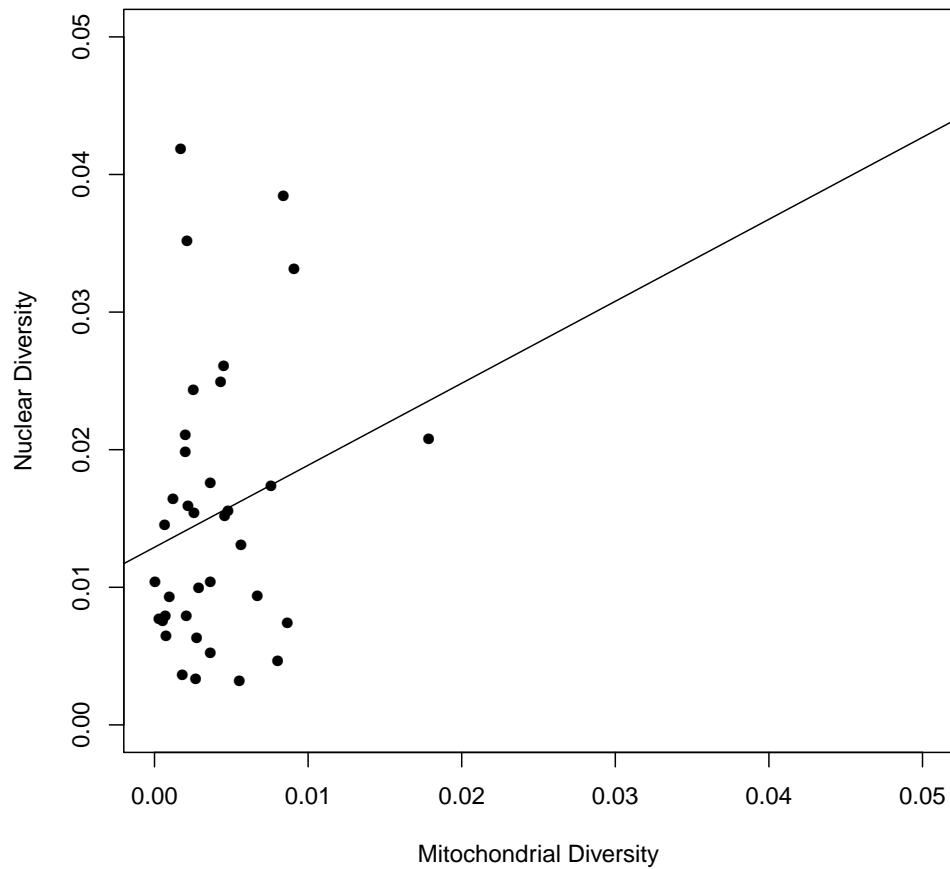

Figure S3: Mitochondrial diversity against nuclear diversity estimated at 4D sites for 36 butterfly species. The slope of best fit is positive (0.07,  $R^2 = 0.0144$ ) but not significant ( $t = 1.229$ ,  $df = 34$ ,  $p = 0.228$ ).

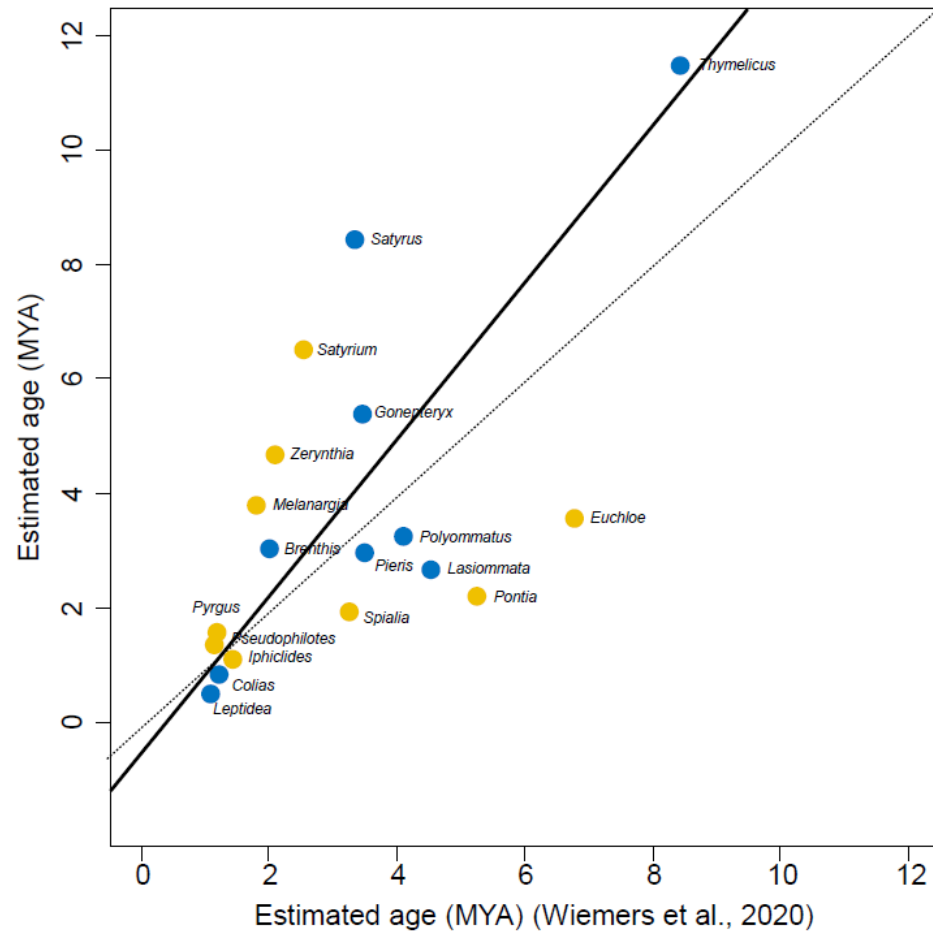

Figure S4: A standardized major axis regression showing a relationship between the age estimates of sister pair nodes in the time calibrated multilocus phylogeny of Wiemers *et al.* [59] and our estimates from nuclear 4D sites. Yellow data points represent species pairs which abut at contact zones, and blue represents sympatric pairs.

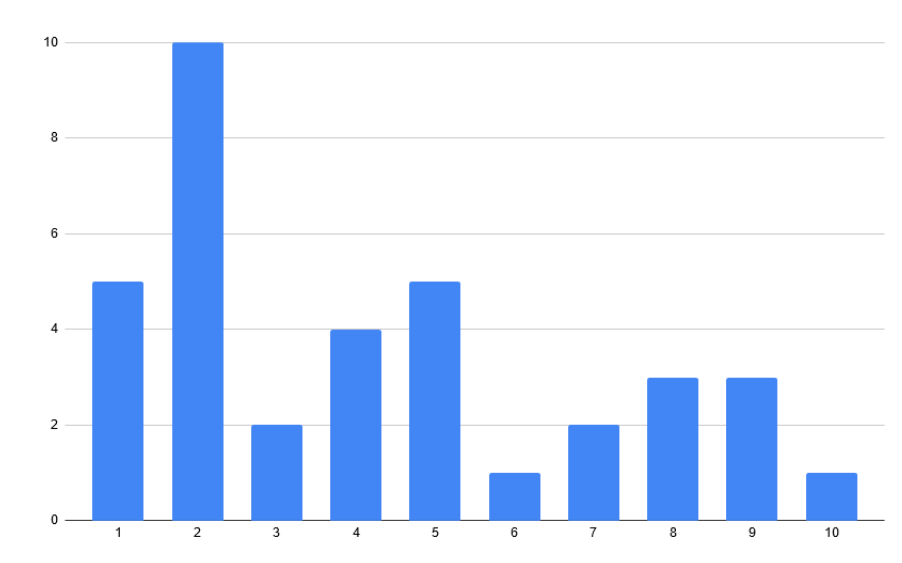

Figure S5: Distribution of the number of loci used by Wiemers *et al.* [59] for the species used in our study.

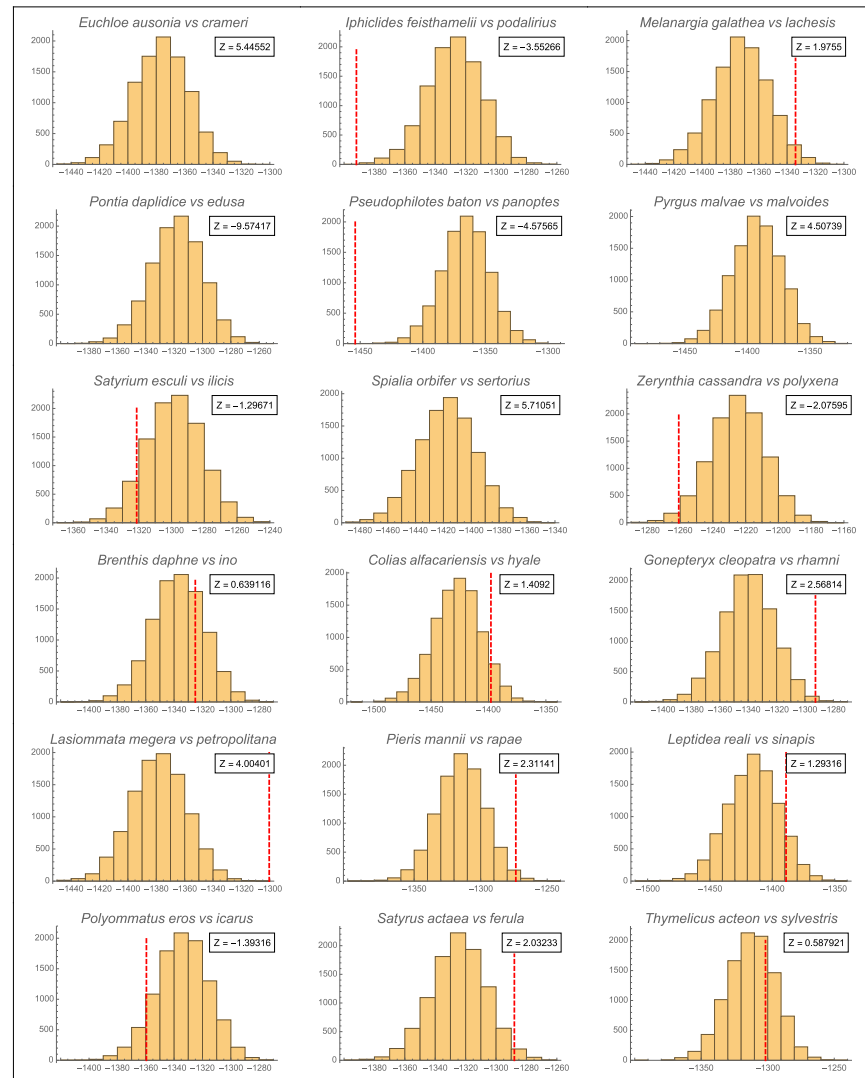

Figure S6: Distribution of log-likelihoods obtained by re-sampling 10,000 data-sets from the expected distribution of S for each species pair. The red dashed line is the log-likelihood of the observed data. Data-sets with a Z score greater than 1.96 show narrower S distributions than expected. Data-sets with a Z score less than -1.96 show broader S distributions than expected.
